# Supplementary material for: Stable Expression of mtlD Gene Imparts Multiple Stress Tolerance in Finger Millet
Source: PubMed Central journal article supplement (PMC4055669; doi:10.1371/journal.pone.0099110), 2014-06-12

Figure S7

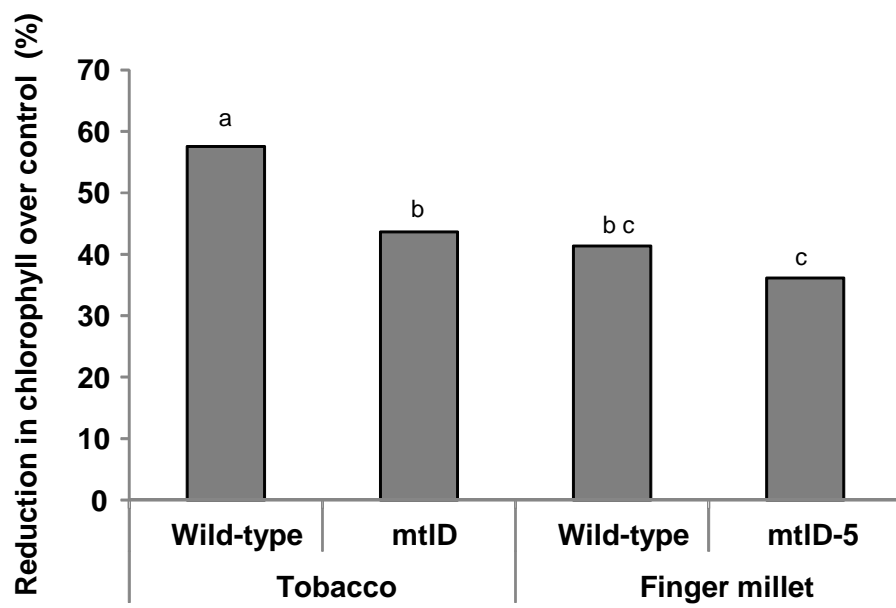

Supplement: pone.0099110.s007.pdf [file pone.0099110.s007.pdf]
