# Supplementary material for: Stable Expression of mtlD Gene Imparts Multiple Stress Tolerance in Finger Millet
Source: PubMed Central journal article supplement (PMC4055669; doi:10.1371/journal.pone.0099110), 2014-06-12
Supplement: pone.0099110.s008.pdf [file pone.0099110.s008.pdf]

Figure S8

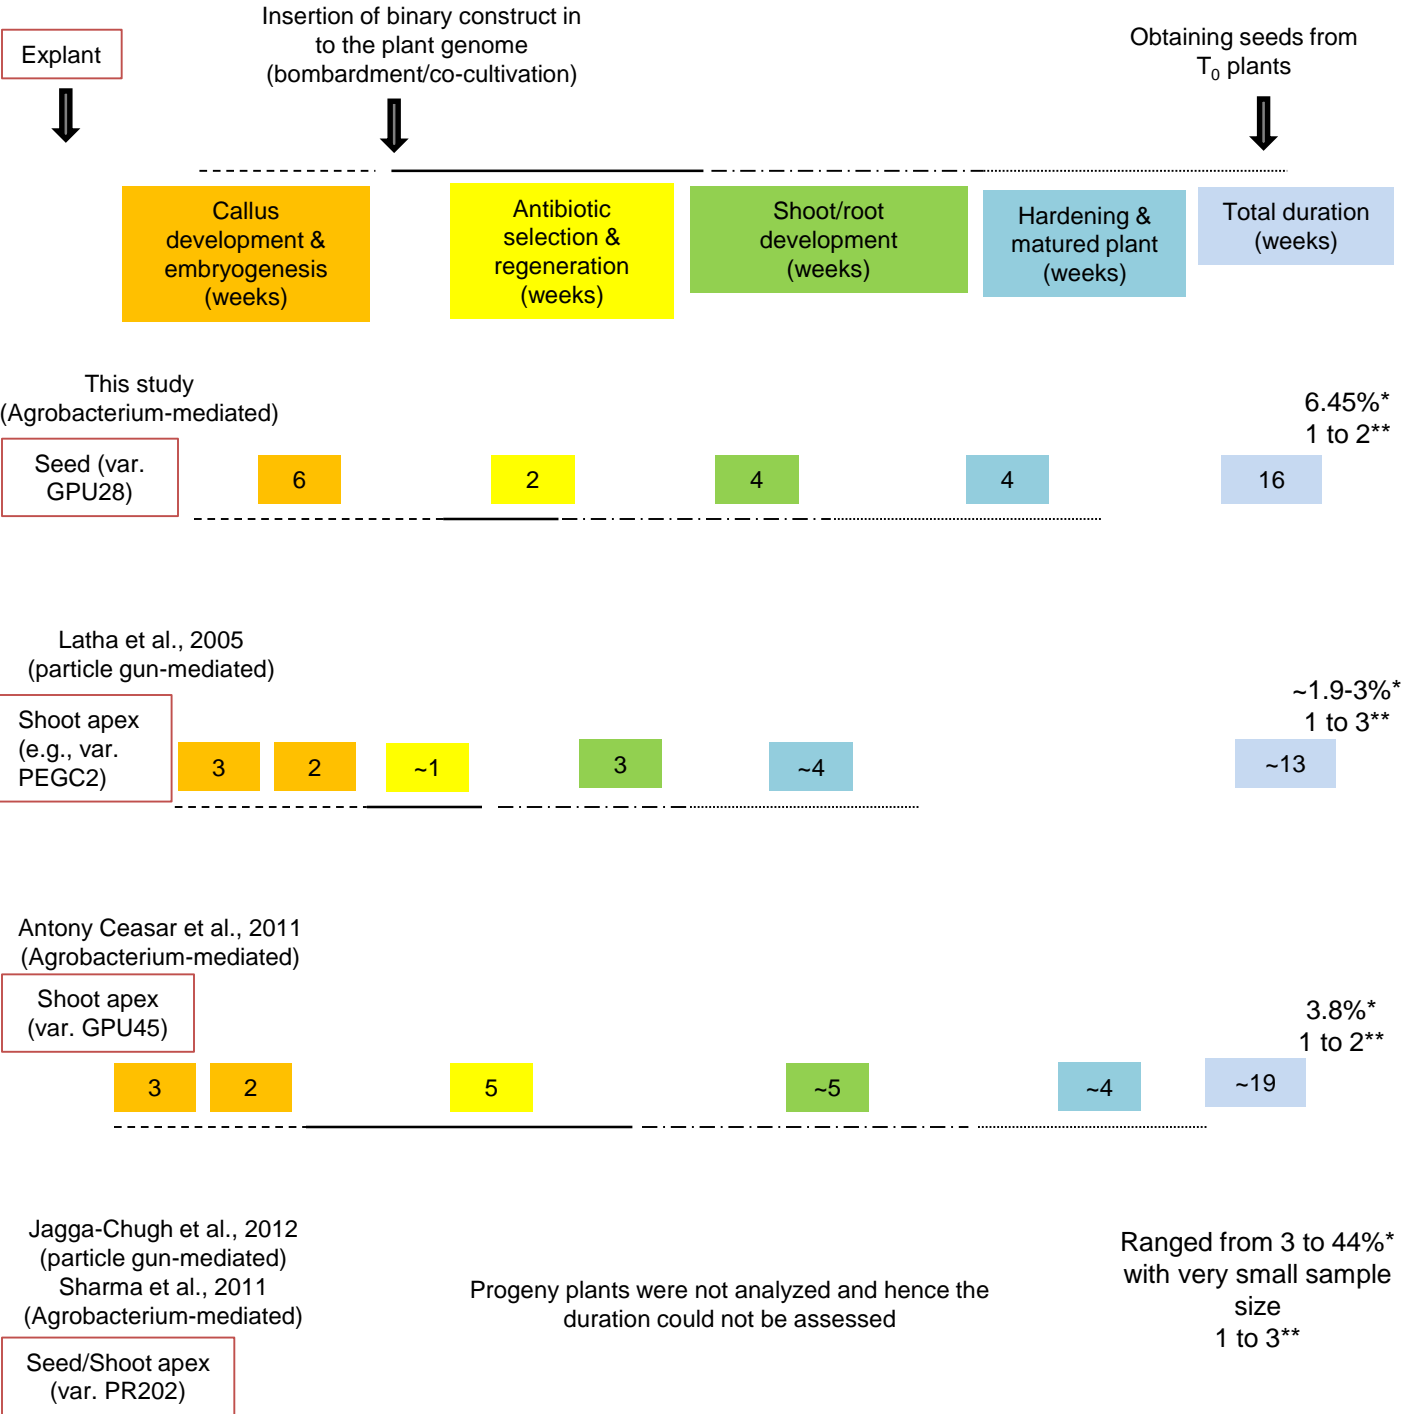

\*transformation efficiency

\*\*copy number of transgene integrated into genome

~denotes calculated theoretical values (authors did not mention the actual values) and the sample number was small (<20)

Numbers given in filled boxes indicate duration in weeks

## Figure S6 (continued)

### References:

1. Antony Ceasar S, Ignacimuthu S (2011) Agrobacterium-mediated transformation of finger millet (*Eleusine coracana* (L.) Gaertn.) using shoot apex explants. *Plant Cell Reports* 30: 1759-1770.
2. Latha AM, Rao KV, Reddy VD (2005) Production of transgenic plants resistant to leaf blast disease in finger millet (*Eleusine coracana* (L.) Gaertn.). *Plant Science* 169: 657-667.
3. Jagga-Chugh S, Kachhwaha S, Sharma M, Kothari-Chajer A, Kothari SL. 2012. Optimization of factors influencing microprojectile bombardment-mediated genetic transformation of seed-derived callus and regeneration of transgenic plants in *Eleusine coracana* (L.) Gaertn. *Plant Cell Tissue and Organ Culture* 109(3): 401-410.
4. Sharma M, Kothari-Chajer A, Jagga-Chugh S, Kothari SL. 2011. Factors influencing *Agrobacterium tumefaciens*-mediated genetic transformation of *Eleusine coracana* (L.) Gaertn. *Plant Cell Tissue and Organ Culture* 105(1): 93-104.
