# Supplementary material for: Stable Expression of mtlD Gene Imparts Multiple Stress Tolerance in Finger Millet
Source: PubMed Central journal article supplement (PMC4055669; doi:10.1371/journal.pone.0099110), 2014-06-12
Supplement: pone.0099110.s009.pdf [file pone.0099110.s009.pdf]

### Supporting information

**Table S1. Standardization of hormonal concentrations for efficient callus induction in finger millet (var. Indaf 9).**

| <b>Medium composition</b>           | <b>17*</b> | <b>19*</b> | <b>21*</b> | <b>23*</b> | <b>25*</b> |
|-------------------------------------|------------|------------|------------|------------|------------|
| Control (MS media without hormones) | 0          | 0          | 0          | 0          | 0          |
| MS + 0.5 mg/L BA + 1.0 mg/L 2,4-D   | 211        | 254        | 289        | 350        | 430        |
| MS + 0.5 mg/LBA + 1.5 mg/L2,4-D     | 207        | 347        | 395        | 460        | 440        |
| MS + 0.5 mg/LBA + 2.0 mg/L2,4-D     | 212        | 351        | 366        | 450        | 440        |
| MS + 0.5 mg/LBA + 2.5 mg/L2,4-D     | 205        | 340        | 369        | 360        | 379        |
| MS + 0.5 mg/LBA + 3.0 mg/L2,4-D     | 245        | 376        | 487        | 500        | 570        |
| MS + 1.0 mg/LBA + 1.0 mg/L2,4-D     | 177        | 268        | 277        | 341        | 460        |
| MS + 1.0 mg/LBA + 1.5 mg/L2,4-D     | 215        | 290        | 333        | 399        | 450        |
| MS + 1.0 mg/LBA + 2.0 mg/L2,4-D     | 200        | 274        | 360        | 360        | 440        |
| MS + 1.0 mg/LBA + 2.5 mg/L2,4-D     | 209        | 266        | 350        | 409        | 380        |
| MS + 1.0 mg/LBA + 3.0 mg/L2,4-D     | 199        | 256        | 360        | 410        | 430        |

\*days after inoculation of seeds

\*\*all values in the table represent callus weight (mg)/ seed callus
