# Supplementary material for: Stable Expression of mtlD Gene Imparts Multiple Stress Tolerance in Finger Millet
Source: PubMed Central journal article supplement (PMC4055669; doi:10.1371/journal.pone.0099110), 2014-06-12
Supplement: pone.0099110.s010.pdf [file pone.0099110.s010.pdf]

**Table S2. Standardization of hormonal concentrations for efficient shoot induction from the callus in finger millet (var. Indaf 9).**

| <b>Treatment</b>                    | <b>Average shoot number per similar size callus</b> | <b>Average shoot length of shoot-lets from the previous column (cm)</b> |
|-------------------------------------|-----------------------------------------------------|-------------------------------------------------------------------------|
| Control (MS media without hormones) | 6                                                   | 2.75                                                                    |
| MS + 0.5 mg/L BA                    | 16                                                  | 3.2                                                                     |
| MS + 1.0 mg/L BA                    | 23                                                  | 4.3                                                                     |
| MS + 0.5 mg/L NAA+ 0.5 mg/L BA      | 10                                                  | 6.8                                                                     |
| MS + 1.0 mg L-1 NAA+ 0.5 mg/L BA    | 9                                                   | 8.3                                                                     |
