# Supplementary material for: Stable Expression of mtlD Gene Imparts Multiple Stress Tolerance in Finger Millet
Source: PubMed Central journal article supplement (PMC4055669; doi:10.1371/journal.pone.0099110), 2014-06-12
Supplement: pone.0099110.s011.pdf [file pone.0099110.s011.pdf]

**Table S3. Efficiency of Agrobacterium-mediated finger millet transformation**

| Sl. No.      | Experiment                       | Number of calli infected | Number of calli survived on antibiotic medium | Number of calli regenerated into shoots | Transformation efficiency (%) |
|--------------|----------------------------------|--------------------------|-----------------------------------------------|-----------------------------------------|-------------------------------|
| 1            | <i>UidA</i> gene transformation* | 73                       | 7                                             | 4                                       | 5.4**                         |
| 2            | <i>mtlD</i> gene transformation* | 80                       | 9                                             | 6                                       | 7.5**                         |
| <b>Total</b> |                                  | 153                      | 16                                            | 10                                      | 6.45                          |
| <b>SD</b>    |                                  |                          | 1.41                                          | 1.48                                    | 1.48                          |

\*finger millet variety GPU28 was used in these studies

\*\*values are given for one set of experiment. Similar results were found in second independent experiment.
