# Supplementary material for: Stable Expression of mtlD Gene Imparts Multiple Stress Tolerance in Finger Millet
Source: PubMed Central journal article supplement (PMC4055669; doi:10.1371/journal.pone.0099110), 2014-06-12
Supplement: pone.0099110.s012.pdf [file pone.0099110.s012.pdf]

**Table S4. Comparison of *mtlD* gene expressing plant species reported in the literature with their corresponding wild-type plants for their abiotic stress tolerance.**

|                  | Increase in tolerance level (%) over wild-type*                 |                |                 |                  |                                                                                                                                                                                                                                                                   |           |
|------------------|-----------------------------------------------------------------|----------------|-----------------|------------------|-------------------------------------------------------------------------------------------------------------------------------------------------------------------------------------------------------------------------------------------------------------------|-----------|
| Plant species    | Parameter used for assessing tolerance level**                  | Drought stress | Salinity stress | Oxidative stress | Treatment details, possible mechanism and other comments                                                                                                                                                                                                          | Reference |
| C3 plant species |                                                                 |                |                 |                  |                                                                                                                                                                                                                                                                   |           |
| Tobacco          | Stem length<br>CO <sub>2</sub> assimilation<br>Membrane leakage | 54             | -               | 2.8<br>37.5      | <ul style="list-style-type: none"> <li>Increased osmotic adjustment played a role in drought tolerance</li> <li>High light induced oxidative stress</li> <li>Methylviologen-mediated oxidative stress</li> <li>Increase in chilling tolerance was 10.4</li> </ul> | [1]       |
| Tobacco          | CO <sub>2</sub> assimilation                                    | 33             | -               | -                | Oxidative stress by methylviologen coupled with drought stress also showed similar results                                                                                                                                                                        | [2]       |
| Tobacco          | Plant growth (biomass)                                          | -              | 53.3            | -                | One of the earliest reports demonstrating possibility of increasing abiotic stress tolerance in plants by expressing <i>mtlD</i> gene                                                                                                                             | [3]       |

|                            |                                   |           |         |      |                                                                                                                                                                                                                                 |                     |
|----------------------------|-----------------------------------|-----------|---------|------|---------------------------------------------------------------------------------------------------------------------------------------------------------------------------------------------------------------------------------|---------------------|
| Tobacco<br>(var.<br>KST19) | Total<br>chlorophyll<br>reduction | -         | -       | 13.9 | Plant level experiment                                                                                                                                                                                                          | [4] (this<br>study) |
| Egg plant                  | Seedling<br>weight                | 66.6-82.3 | 50-88.8 | -    | 10% PEG was used<br>200 mMNaCl was used                                                                                                                                                                                         | [5]                 |
| Arabidopsis                | Seed<br>germination               | -         | 45      | -    | 200 mMNaCl was used                                                                                                                                                                                                             | [6]                 |
| Tomato                     | Biomass<br>Seed<br>germination    | 28.5      | 42      | -    | 10% PEG was used<br><br>50 mMNaCl was used                                                                                                                                                                                      | [7]                 |
| Potato                     |                                   | -         | 59.2    | -    | <ul style="list-style-type: none"> <li>• 100 mMNaCl was used</li> <li>• Cellular protection (via free radical removal or macro molecules protection) might be reason for increased tolerance of transgenic seedlings</li> </ul> | [8]                 |
| Petunia                    | Root/shoot<br>dry weight          | -         | -       | -    | Increase in chilling stress tolerance was 5.19-16.33; Increased osmotic adjustment played a role                                                                                                                                | [9]                 |
| Wheat                      | Shoot dry<br>weight               | 54.1      | 50      | -    | <ul style="list-style-type: none"> <li>• Osmotic adjustment did not play role in drought tolerance</li> <li>• Protection from free radical might be reason for increased tolerance</li> </ul>                                   | [10]                |

|                  |                    |      |        |     |                                   |                  |
|------------------|--------------------|------|--------|-----|-----------------------------------|------------------|
| Rice             | Shoot height       | -    | 77-141 | -   | -                                 | [11]             |
|                  | Biomass            |      | 17-50  |     |                                   |                  |
| C4 plant species |                    |      |        |     |                                   |                  |
| Sorghum          | Leaf water content | 2.6  |        | -   | • PEG assay                       | [12]             |
|                  | Biomass            |      | 17-23  |     | • 200 mMNaCl stress               |                  |
| Finger millet    | Seedling growth    | 8-10 | 4-7    | 5-6 | Seedling experiment [mtID-5-1 T2] | [4] (this study) |

\*calculated value

\*\*also indicate the experimental data in the manuscript considered for calculations of increased tolerance

## References

1. Macaluso L, Lo Bianco R, Rieger M (2007) Mannitol-producing tobacco exposed to varying levels of water, light, temperature and paraquat. *Journal of Horticultural Science & Biotechnology* 82: 979-985.
2. Alam B, Jacob J, Earl HJ (2010) Photosynthetic efficiency of transgenic tobacco plants (*Nicotiana tabacum* l.) over-expressing *mtld* gene under drought and paraquat stress. *Indian Journal of Plant Physiology* 15: 186-191.
3. Tarczynski MC, Jensen RG, Bohnert HJ (1993) Stress protection of transgenic tobacco by production of the osmolyte mannitol. *Science* 259: 508-510.
4. Hema R (2006) Relevance of mannitol in dehydration stress tolerance: development and analysis of the transgenics expressing *mtID* in model systems and finger millet (*Eleusine coracana* (l.) gaertn) [PhD]. Bangalore: University of Agricultural Sciences. 197 p.
5. Prabhavathi V, Yadav JS, Kumar PA, Rajam MV (2002) Abiotic stress tolerance in transgenic eggplant (*Solanum melongena* L.) by introduction of bacterial mannitol phosphodehydrogenase gene. *Molecular Breeding* 9: 137-147.
6. Thomas JC, Sepahi M, Arendall B, Bohnert HJ (1995) Enhancement of seed germination in high salinity by engineering mannitol expression in *Arabidopsis thaliana*. *Plant, Cell & Environment* 18: 801-806.
7. Khare N, Goyary D, Singh NK, Shah P, Rathore M, et al. (2010) Transgenic tomato cv. Pusa Uphar expressing a bacterial mannitol-1-phosphate dehydrogenase gene confers abiotic stress tolerance. *Plant Cell Tissue and Organ Culture* 103: 267-277.

8. Rahnama H, Vakilian H, Fahimi H, Ghareyazie B (2011) Enhanced salt stress tolerance in transgenic potato plants (*Solanum tuberosum* L.) expressing a bacterial *mtlD* gene. *Acta Physiologiae Plantarum* 33: 1521-1532.
9. Chiang YJ, Stushnoff C, McSay AE (2005) Overexpression of mannitol-1-phosphate dehydrogenase increases mannitol accumulation and adds protection against chilling injury in petunia. *Journal of the American Society for Horticultural Science* 130: 605-610.
10. Abebe T, Guenzi AC, Martin B, Cushman JC (2003) Tolerance of mannitol accumulating transgenic wheat to water stress and salinity. *Plant Physiology* 131: 1748-1755.
11. Su J, Chen P, Wu R (1999) Transgene expression of mannitol-1-phosphate dehydrogenase enhanced the salt-stress tolerance of the transgenic rice seedlings. *Scientia Agricultura Sinica* 32: 101-103.
12. Maheswari M, Varalaxmi Y, Vijayalakshmi A, Yadav SK, Sharmila P, et al. (2010) Metabolic engineering using *mtlD* gene enhances tolerance to water deficit and salinity in sorghum. *Biologia Plantarum* 54: 647-652.
